# Supplementary material for: Integrated physiological, transcriptomic, and metabolomic analyses of drought stress alleviation in Ehretia macrophylla Wall. seedlings by SiO2 NPs (silica nanoparticles)
Source: Front Plant Sci. 2024 Feb 2;15:1260140. doi: 10.3389/fpls.2024.1260140 (PMC10869631; doi:10.3389/fpls.2024.1260140)
Supplement: Supplementary file 20 [file Table_11.xlsx]

## Sheet: SD_vs_CK
Table S9 DEGs in "alpha-Linolenic acid metabolism" pathway of SD_vs_CK
Gene id	SD_readcount	CK_readcount	log2FoldChange	pvalue	padj	NR_annotation	Swissprot_annotation	Pfam_annotation	KO_annotation
TRINITY_DN3801_c0_g2	2399.41	941.81	1.3494	2.04e-07	5.73e-06	jasmonate O-methyltransferase [Manihot esculenta]|OAY50692.1 hypothetical protein MANES_05G156400 [Manihot esculenta]	Jasmonate O-methyltransferase OS=Arabidopsis thaliana OX=3702 GN=JMT PE=1 SV=3	SAM dependent carboxyl methyltransferase	K08241|E2.1.1.141; jasmonate O	ko00592(Metabolism);ko01110(Metabolism)
TRINITY_DN3801_c0_g3	4073.07	1322.59	1.6225	2.9e-11	1.51e-09	hypothetical protein MIMGU_mgv1a013852mg [Erythranthe guttata]	7-methylxanthosine synthase 1 OS=Coffea canephora OX=49390 GN=XMT1 PE=1 SV=1	-	K08241|E2.1.1.141; jasmonate O	ko00592(Metabolism);ko01110(Metabolism)
TRINITY_DN7424_c2_g1	11113.7	4244.03	1.3889	0.0019803	0.020146	PREDICTED: allene oxide synthase, chloroplastic-like [Nicotiana sylvestris]|XP_016441462.1 PREDICTED: allene oxide synthase, chloroplastic-like [Nicotiana tabacum]	Allene oxide synthase 1, chloroplastic OS=Solanum lycopersicum OX=4081 GN=AOS1 PE=2 SV=1	Cytochrome P450	K01723|AOS; hydroperoxide dehydratase [EC:4.2.1.92]	ko00592(Metabolism);ko01100(Metabolism);ko01110(Metabolism)
TRINITY_DN3153_c1_g1	6509.24	2342.48	1.4746	5.67e-09	2.09e-07	glyoxysomal fatty acid beta-oxidation multifunctional protein MFP-a [Coffea eugenioides]	Peroxisomal fatty acid beta-oxidation multifunctional protein MFP2 OS=Arabidopsis thaliana OX=3702 GN=MFP2 PE=1 SV=1	3-hydroxyacyl-CoA dehydrogenase, C-terminal domain;3-hydroxyacyl-CoA dehydrogenase, NAD binding domain;Enoyl-CoA hydratase/isomerase;Enoyl-CoA hydratase/isomerase	K10527|MFP2; enoyl-CoA hydratase/3-hydroxyacyl	ko00071(Metabolism);ko00592(Metabolism);ko01100(Metabolism);ko01110(Metabolism);ko01212(Metabolism)
TRINITY_DN43273_c0_g1	51.51	0.66	6.2837	0.00028196	0.0038257	phospholipase A(1) DAD1, chloroplastic-like [Coffea arabica]|XP_027157719.1 phospholipase A(1) DAD1, chloroplastic-like [Coffea eugenioides]	Phospholipase A(1) DAD1, chloroplastic OS=Arabidopsis thaliana OX=3702 GN=DAD1 PE=1 SV=1	Lipase (class 3)	K16818|DAD1; phospholipase A1 [EC:3.1.1.32]	ko00564(Metabolism);ko00592(Metabolism);ko01100(Metabolism);ko01110(Metabolism)
TRINITY_DN25820_c0_g1	17.57	1.59	3.4342	0.0021909	0.021891	-	Peroxisomal fatty acid beta-oxidation multifunctional protein AIM1 OS=Arabidopsis thaliana OX=3702 GN=AIM1 PE=1 SV=1	-	K10527|MFP2; enoyl-CoA hydratase/3-hydroxyacyl	ko00071(Metabolism);ko00592(Metabolism);ko01100(Metabolism);ko01110(Metabolism);ko01212(Metabolism)
TRINITY_DN21473_c1_g1	33.9	6.75	2.3542	0.004931	0.042607	Linoleate 13S-lipoxygenase [Handroanthus impetiginosus]	Linoleate 13S-lipoxygenase 2-1, chloroplastic OS=Solanum tuberosum OX=4113 GN=LOX2.1 PE=1 SV=1	-	K00454|LOX2S; lipoxygenase [EC:1.13.11.12]	ko00591(Metabolism);ko00592(Metabolism);ko01100(Metabolism);ko01110(Metabolism)
TRINITY_DN3801_c11_g1	41.4	0	7.8141	2.23e-08	7.43e-07	jasmonate O-methyltransferase-like [Olea europaea var. sylvestris]	Jasmonate O-methyltransferase OS=Brassica rapa subsp. pekinensis OX=51351 GN=JMT PE=1 SV=1	-	K08241|E2.1.1.141; jasmonate O	ko00592(Metabolism);ko01110(Metabolism)
TRINITY_DN627_c1_g2	4491.49	1593.93	1.4945	2.18e-07	6.07e-06	3-ketoacyl-CoA thiolase 1 [Rehmannia glutinosa]	3-ketoacyl-CoA thiolase 2, peroxisomal OS=Arabidopsis thaliana OX=3702 GN=PED1 PE=1 SV=2	Thiolase, C-terminal domain;Thiolase, N-terminal domain	K07513|ACAA1; acetyl	ko00071(Metabolism);ko00280(Metabolism);ko00592(Metabolism);ko01040(Metabolism);ko01100(Metabolism);ko01110(Metabolism);ko01212(Metabolism);ko03320(Organismal Systems);ko04146(Cellular Processes)
TRINITY_DN6267_c0_g1	5878.55	268.43	4.4519	7.73e-34	3.44e-31	acyl-coenzyme A oxidase 2, peroxisomal [Sesamum indicum]	Acyl-coenzyme A oxidase, peroxisomal OS=Cucurbita maxima OX=3661 GN=Acx PE=1 SV=1	Acyl-CoA oxidase;Acyl-CoA dehydrogenase, C-terminal domain;Acyl-CoA dehydrogenase, middle domain;Protein of unknown function (DUF632);Protein of unknown function (DUF632)	K00232|E1.3.3.6, ACOX1, ACOX3; acyl	ko00071(Metabolism);ko00410(Metabolism);ko00592(Metabolism);ko00640(Metabolism);ko01040(Metabolism);ko01100(Metabolism);ko01110(Metabolism);ko01200(Metabolism);ko01212(Metabolism);ko03320(Organismal Systems);ko04024(Environmental Information Processing);ko04146(Cellular Processes)
TRINITY_DN6781_c0_g1	3313.08	519.5	2.6735	4.49e-28	1.27e-25	linoleate 13S-lipoxygenase 3-1, chloroplastic-like [Camellia sinensis]	Linoleate 13S-lipoxygenase 3-1, chloroplastic OS=Solanum tuberosum OX=4113 GN=LOX3.1 PE=1 SV=1	Lipoxygenase;Lipoxygenase	K00454|LOX2S; lipoxygenase [EC:1.13.11.12]	ko00591(Metabolism);ko00592(Metabolism);ko01100(Metabolism);ko01110(Metabolism)
TRINITY_DN11419_c0_g1	497.92	86.45	2.5304	2.36e-06	5.33e-05	linoleate 13S-lipoxygenase 2-1, chloroplastic-like [Sesamum indicum]	Linoleate 13S-lipoxygenase 2-1, chloroplastic OS=Solanum tuberosum OX=4113 GN=LOX2.1 PE=1 SV=1	-	K00454|LOX2S; lipoxygenase [EC:1.13.11.12]	ko00591(Metabolism);ko00592(Metabolism);ko01100(Metabolism);ko01110(Metabolism)
TRINITY_DN14251_c0_g1	884.35	190.56	2.2169	9e-12	5.04e-10	unnamed protein product [Coffea canephora]	Allene oxide synthase 3 OS=Solanum lycopersicum OX=4081 GN=AOS3 PE=1 SV=1	Cytochrome P450	K01723|AOS; hydroperoxide dehydratase [EC:4.2.1.92]	ko00592(Metabolism);ko01100(Metabolism);ko01110(Metabolism)
TRINITY_DN8083_c0_g1	348.81	8.57	5.3232	6.43e-17	6.79e-15	alpha-dioxygenase 1 [Manihot esculenta]|OAY25843.1 hypothetical protein MANES_17G124300 [Manihot esculenta]	Alpha-dioxygenase 1 OS=Arabidopsis thaliana OX=3702 GN=DOX1 PE=1 SV=1	Animal haem peroxidase	K10529|DOX; fatty acid alpha	ko00592(Metabolism);ko01110(Metabolism)
TRINITY_DN6787_c0_g1	34.22	3.18	3.4022	0.00019389	0.0027661	PREDICTED: peroxisomal fatty acid beta-oxidation multifunctional protein AIM1-like isoform X1 [Pyrus x bretschneideri]	Peroxisomal fatty acid beta-oxidation multifunctional protein OS=Oryza sativa subsp. japonica OX=39947 GN=MFP PE=1 SV=2	-	K10527|MFP2; enoyl-CoA hydratase/3-hydroxyacyl	ko00071(Metabolism);ko00592(Metabolism);ko01100(Metabolism);ko01110(Metabolism);ko01212(Metabolism)
TRINITY_DN17116_c0_g1	50.04	2.85	4.1024	2.91e-06	6.44e-05	Acyl-CoA oxidase, partial [Handroanthus impetiginosus]	Acyl-coenzyme A oxidase, peroxisomal OS=Cucurbita maxima OX=3661 GN=Acx PE=1 SV=1	-	K00232|E1.3.3.6, ACOX1, ACOX3; acyl	ko00071(Metabolism);ko00410(Metabolism);ko00592(Metabolism);ko00640(Metabolism);ko01040(Metabolism);ko01100(Metabolism);ko01110(Metabolism);ko01200(Metabolism);ko01212(Metabolism);ko03320(Organismal Systems);ko04024(Environmental Information Processing);ko04146(Cellular Processes)
TRINITY_DN816_c0_g1	85319.9	8367.35	3.3501	3.75e-24	7.79e-22	Linoleate 13S-lipoxygenase [Actinidia chinensis var. chinensis]	Linoleate 13S-lipoxygenase 2-1, chloroplastic OS=Solanum tuberosum OX=4113 GN=LOX2.1 PE=1 SV=1	Lipoxygenase;Lipoxygenase	K00454|LOX2S; lipoxygenase [EC:1.13.11.12]	ko00591(Metabolism);ko00592(Metabolism);ko01100(Metabolism);ko01110(Metabolism)
TRINITY_DN3516_c0_g1	13840.5	6799.75	1.0254	3.45e-06	7.5e-05	fatty acid hydroperoxide lyase, chloroplastic [Coffea eugenioides]	Fatty acid hydroperoxide lyase, chloroplastic OS=Solanum lycopersicum OX=4081 GN=HPL PE=1 SV=1	Cytochrome P450	K10528|HPL; hydroperoxide lyase [EC:4.1.2.	ko00592(Metabolism);ko01110(Metabolism)
TRINITY_DN5895_c1_g1	456.65	9.93	5.5429	8.15e-32	3.13e-29	PREDICTED: LOW QUALITY PROTEIN: linoleate 13S-lipoxygenase 2-1, chloroplastic-like [Capsicum annuum]	Linoleate 13S-lipoxygenase 2-1, chloroplastic OS=Solanum tuberosum OX=4113 GN=LOX2.1 PE=1 SV=1	-	K00454|LOX2S; lipoxygenase [EC:1.13.11.12]	ko00591(Metabolism);ko00592(Metabolism);ko01100(Metabolism);ko01110(Metabolism)
TRINITY_DN22054_c0_g1	630.7	34.13	4.2039	1.93e-24	4.09e-22	Peroxisomal 3-ketoacyl-CoA thiolase 3 isoform 3 [Theobroma cacao]	3-ketoacyl-CoA thiolase 1, peroxisomal OS=Arabidopsis thaliana OX=3702 GN=KAT1 PE=1 SV=2	-	K07513|ACAA1; acetyl	ko00071(Metabolism);ko00280(Metabolism);ko00592(Metabolism);ko01040(Metabolism);ko01100(Metabolism);ko01110(Metabolism);ko01212(Metabolism);ko03320(Organismal Systems);ko04146(Cellular Processes)
TRINITY_DN9903_c1_g1	15.98	83.13	-2.3781	3.52e-05	0.00061467	12-oxophytodienoate reductase 2 [Ricinus communis]	Putative 12-oxophytodienoate reductase 11 OS=Oryza sativa subsp. japonica OX=39947 GN=OPR11 PE=2 SV=1	NADH:flavin oxidoreductase / NADH oxidase family	K05894|OPR; 12	ko00592(Metabolism);ko01100(Metabolism);ko01110(Metabolism)
TRINITY_DN15623_c0_g1	26.02	133.12	-2.3637	1.17e-05	0.0002271	Linoleate 9S-lipoxygenase 6 [Vitis vinifera]	Linoleate 9S-lipoxygenase A OS=Solanum lycopersicum OX=4081 GN=LOX1.1 PE=2 SV=1	Lipoxygenase;Lipoxygenase;PLAT/LH2 domain	K00454|LOX2S; lipoxygenase [EC:1.13.11.12]	ko00591(Metabolism);ko00592(Metabolism);ko01100(Metabolism);ko01110(Metabolism)
TRINITY_DN11209_c0_g1	170.66	529.88	-1.6385	1.3e-05	0.00025063	PREDICTED: 7-methylxanthosine synthase 1-like isoform X1 [Nicotiana tomentosiformis]	Probable caffeine synthase 3 OS=Coffea arabica OX=13443 GN=CS3 PE=2 SV=1	SAM dependent carboxyl methyltransferase;SAM dependent carboxyl methyltransferase	K08241|E2.1.1.141; jasmonate O	ko00592(Metabolism);ko01110(Metabolism)

## Sheet: SD_vs_NPs-SD
Table S11 DEGs in "alpha-Linolenic acid metabolism" pathway of SD_vs_NPs-SD
Gene id	SD_readcount	NPs-SD_readcount	log2FoldChange	pvalue	padj	NR_annotation	Swissprot_annotation	Pfam_annotation	KO_annotation	Pathway_annotation
TRINITY_DN9064_c0_g1	59.78	2.81	4.413	4.0306e-07	1.0734e-05	hypothetical protein DVH24_016567 [Malus domestica]	Putative 12-oxophytodienoate reductase-like protein 1 OS=Arabidopsis thaliana OX=3702 GN=At1g09400 PE=2 SV=2	-	K05894|OPR; 12	ko00592(Metabolism);ko01100(Metabolism);ko01110(Metabolism)
TRINITY_DN3801_c0_g2	2568.54	491.4	2.3859	9.7495e-29	3.7745e-26	jasmonate O-methyltransferase [Manihot esculenta]|OAY50692.1 hypothetical protein MANES_05G156400 [Manihot esculenta]	Jasmonate O-methyltransferase OS=Arabidopsis thaliana OX=3702 GN=JMT PE=1 SV=3	SAM dependent carboxyl methyltransferase	K08241|E2.1.1.141; jasmonate O	ko00592(Metabolism);ko01110(Metabolism)
TRINITY_DN3801_c0_g3	4370.69	531.97	3.0378	4.7565e-40	4.2874e-37	hypothetical protein MIMGU_mgv1a013852mg [Erythranthe guttata]	7-methylxanthosine synthase 1 OS=Coffea canephora OX=49390 GN=XMT1 PE=1 SV=1	-	K08241|E2.1.1.141; jasmonate O	ko00592(Metabolism);ko01110(Metabolism)
TRINITY_DN7424_c2_g1	12029.5	4251.9	1.5005	2.0338e-05	0.0003642	PREDICTED: allene oxide synthase, chloroplastic-like [Nicotiana sylvestris]|XP_016441462.1 PREDICTED: allene oxide synthase, chloroplastic-like [Nicotiana tabacum]	Allene oxide synthase 1, chloroplastic OS=Solanum lycopersicum OX=4081 GN=AOS1 PE=2 SV=1	Cytochrome P450	K01723|AOS; hydroperoxide dehydratase [EC:4.2.1.92]	ko00592(Metabolism);ko01100(Metabolism);ko01110(Metabolism)
TRINITY_DN68431_c0_g1	46.08	0.34	7.0917	0.0009927	0.010503	linoleate 13S-lipoxygenase 3-1, chloroplastic-like [Olea europaea var. sylvestris]	Linoleate 13S-lipoxygenase 3-1, chloroplastic OS=Solanum tuberosum OX=4113 GN=LOX3.1 PE=1 SV=1	-	K00454|LOX2S; lipoxygenase [EC:1.13.11.12]	ko00591(Metabolism);ko00592(Metabolism);ko01100(Metabolism);ko01110(Metabolism)
TRINITY_DN43273_c0_g1	56.49	0	8.3466	0.0019678	0.018707	phospholipase A(1) DAD1, chloroplastic-like [Coffea arabica]|XP_027157719.1 phospholipase A(1) DAD1, chloroplastic-like [Coffea eugenioides]	Phospholipase A(1) DAD1, chloroplastic OS=Arabidopsis thaliana OX=3702 GN=DAD1 PE=1 SV=1	Lipase (class 3)	K16818|DAD1; phospholipase A1 [EC:3.1.1.32]	ko00564(Metabolism);ko00592(Metabolism);ko01100(Metabolism);ko01110(Metabolism)
TRINITY_DN25820_c0_g1	18.92	3.53	2.4441	0.0020399	0.019296	-	Peroxisomal fatty acid beta-oxidation multifunctional protein AIM1 OS=Arabidopsis thaliana OX=3702 GN=AIM1 PE=1 SV=1	-	K10527|MFP2; enoyl-CoA hydratase/3-hydroxyacyl	ko00071(Metabolism);ko00592(Metabolism);ko01100(Metabolism);ko01110(Metabolism);ko01212(Metabolism)
TRINITY_DN21473_c1_g1	36.3	9.28	1.9815	0.00047449	0.005595	Linoleate 13S-lipoxygenase [Handroanthus impetiginosus]	Linoleate 13S-lipoxygenase 2-1, chloroplastic OS=Solanum tuberosum OX=4113 GN=LOX2.1 PE=1 SV=1	-	K00454|LOX2S; lipoxygenase [EC:1.13.11.12]	ko00591(Metabolism);ko00592(Metabolism);ko01100(Metabolism);ko01110(Metabolism)
TRINITY_DN3801_c11_g1	44.67	5.23	3.0859	6.2777e-07	1.6042e-05	jasmonate O-methyltransferase-like [Olea europaea var. sylvestris]	Jasmonate O-methyltransferase OS=Brassica rapa subsp. pekinensis OX=51351 GN=JMT PE=1 SV=1	-	K08241|E2.1.1.141; jasmonate O	ko00592(Metabolism);ko01110(Metabolism)
TRINITY_DN4042_c1_g1	343.91	159.91	1.1066	0.0042821	0.035708	PREDICTED: 12-oxophytodienoate reductase 2-like isoform X1 [Ipomoea nil]	12-oxophytodienoate reductase 2 OS=Arabidopsis thaliana OX=3702 GN=OPR2 PE=1 SV=2	-	K05894|OPR; 12	ko00592(Metabolism);ko01100(Metabolism);ko01110(Metabolism)
TRINITY_DN6267_c0_g1	6316.94	705.08	3.1638	1.3565e-25	3.8689e-23	acyl-coenzyme A oxidase 2, peroxisomal [Sesamum indicum]	Acyl-coenzyme A oxidase, peroxisomal OS=Cucurbita maxima OX=3661 GN=Acx PE=1 SV=1	Acyl-CoA oxidase;Acyl-CoA dehydrogenase, C-terminal domain;Acyl-CoA dehydrogenase, middle domain;Protein of unknown function (DUF632);Protein of unknown function (DUF632)	K00232|E1.3.3.6, ACOX1, ACOX3; acyl	ko00071(Metabolism);ko00410(Metabolism);ko00592(Metabolism);ko00640(Metabolism);ko01040(Metabolism);ko01100(Metabolism);ko01110(Metabolism);ko01200(Metabolism);ko01212(Metabolism);ko03320(Organismal Systems);ko04024(Environmental Information Processing);ko04146(Cellular Processes)
TRINITY_DN6781_c0_g1	3546.7	1438.73	1.3018	1.2291e-09	5.3475e-08	linoleate 13S-lipoxygenase 3-1, chloroplastic-like [Camellia sinensis]	Linoleate 13S-lipoxygenase 3-1, chloroplastic OS=Solanum tuberosum OX=4113 GN=LOX3.1 PE=1 SV=1	Lipoxygenase;Lipoxygenase	K00454|LOX2S; lipoxygenase [EC:1.13.11.12]	ko00591(Metabolism);ko00592(Metabolism);ko01100(Metabolism);ko01110(Metabolism)
TRINITY_DN17401_c0_g1	9.93	0	5.8482	0.0012191	0.012491	PREDICTED: putative 12-oxophytodienoate reductase 11 [Pyrus x bretschneideri]	12-oxophytodienoate reductase 1 OS=Arabidopsis thaliana OX=3702 GN=OPR1 PE=1 SV=2	-	K05894|OPR; 12	ko00592(Metabolism);ko01100(Metabolism);ko01110(Metabolism)
TRINITY_DN66660_c0_g1	28.29	0.96	4.906	0.00011183	0.0016105	putative 12-oxophytodienoate reductase 11 [Coffea arabica]	Putative 12-oxophytodienoate reductase 11 OS=Oryza sativa subsp. japonica OX=39947 GN=OPR11 PE=2 SV=1	-	K05894|OPR; 12	ko00592(Metabolism);ko01100(Metabolism);ko01110(Metabolism)
TRINITY_DN8388_c0_g2	37.26	2.38	3.9331	2.8145e-06	6.2434e-05	alcohol dehydrogenase 1 [Phoenix dactylifera]|XP_008786548.1 alcohol dehydrogenase 1 [Phoenix dactylifera]	Alcohol dehydrogenase 1 OS=Zea mays OX=4577 GN=ADH1 PE=2 SV=1	-	K18857|ADH1; alcohol dehydrogenase class	ko00010(Metabolism);ko00071(Metabolism);ko00350(Metabolism);ko00592(Metabolism);ko00620(Metabolism);ko01100(Metabolism);ko01110(Metabolism);ko01120(Metabolism)
TRINITY_DN9235_c0_g1	114.85	2.45	5.5431	2.3883e-05	0.00041948	linoleate 13S-lipoxygenase 3-1, chloroplastic [Capsicum annuum]|AFU51541.1 lipoxygenase 2 [Capsicum annuum]	Linoleate 13S-lipoxygenase 3-1, chloroplastic OS=Solanum tuberosum OX=4113 GN=LOX3.1 PE=1 SV=1	Lipoxygenase	K00454|LOX2S; lipoxygenase [EC:1.13.11.12]	ko00591(Metabolism);ko00592(Metabolism);ko01100(Metabolism);ko01110(Metabolism)
TRINITY_DN5895_c1_g1	488.97	35.81	3.7725	5.2038e-37	3.6575e-34	PREDICTED: LOW QUALITY PROTEIN: linoleate 13S-lipoxygenase 2-1, chloroplastic-like [Capsicum annuum]	Linoleate 13S-lipoxygenase 2-1, chloroplastic OS=Solanum tuberosum OX=4113 GN=LOX2.1 PE=1 SV=1	-	K00454|LOX2S; lipoxygenase [EC:1.13.11.12]	ko00591(Metabolism);ko00592(Metabolism);ko01100(Metabolism);ko01110(Metabolism)
TRINITY_DN6614_c0_g1	20.39	0.88	4.4876	0.001147	0.011879	PREDICTED: jasmonate O-methyltransferase-like [Erythranthe guttata]|EYU29443.1 hypothetical protein MIMGU_mgv1a018479mg [Erythranthe guttata]	Probable caffeine synthase 2 OS=Camellia sinensis OX=4442 GN=TCS2 PE=2 SV=1	-	K08241|E2.1.1.141; jasmonate O	ko00592(Metabolism);ko01110(Metabolism)
TRINITY_DN15228_c1_g1	34.75	0.62	5.8044	4.6151e-06	9.7405e-05	putative 12-oxophytodienoate reductase [Rosa chinensis]	12-oxophytodienoate reductase 1 OS=Arabidopsis thaliana OX=3702 GN=OPR1 PE=1 SV=2	-	K05894|OPR; 12	ko00592(Metabolism);ko01100(Metabolism);ko01110(Metabolism)
TRINITY_DN22054_c0_g1	680.23	189.95	1.8412	2.254e-08	7.7036e-07	Peroxisomal 3-ketoacyl-CoA thiolase 3 isoform 3 [Theobroma cacao]	3-ketoacyl-CoA thiolase 1, peroxisomal OS=Arabidopsis thaliana OX=3702 GN=KAT1 PE=1 SV=2	-	K07513|ACAA1; acetyl	ko00071(Metabolism);ko00280(Metabolism);ko00592(Metabolism);ko01040(Metabolism);ko01100(Metabolism);ko01110(Metabolism);ko01212(Metabolism);ko03320(Organismal Systems);ko04146(Cellular Processes)
TRINITY_DN9903_c1_g1	17.12	62.2	-1.8525	0.00032391	0.0040457	12-oxophytodienoate reductase 2 [Ricinus communis]	Putative 12-oxophytodienoate reductase 11 OS=Oryza sativa subsp. japonica OX=39947 GN=OPR11 PE=2 SV=1	NADH:flavin oxidoreductase / NADH oxidase family	K05894|OPR; 12	ko00592(Metabolism);ko01100(Metabolism);ko01110(Metabolism)
TRINITY_DN16802_c0_g1	199.26	5569.79	-4.8021	1.2389e-50	2.0605e-47	PREDICTED: photosystem I reaction center subunit N, chloroplastic isoform X1 [Theobroma cacao]	Photosystem I reaction center subunit N, chloroplastic OS=Arabidopsis thaliana OX=3702 GN=PSAN PE=1 SV=2	Photosystem I reaction centre subunit N (PSAN or PSI-N)	K02701|psaN; photosystem I subunit PsaN	ko00195(Metabolism);ko01100(Metabolism)
TRINITY_DN13361_c1_g1	2.67	20.68	-2.9382	0.00039512	0.0047794	-	Peroxisomal fatty acid beta-oxidation multifunctional protein AIM1 OS=Arabidopsis thaliana OX=3702 GN=AIM1 PE=1 SV=1	-	K10527|MFP2; enoyl-CoA hydratase/3-hydroxyacyl	ko00071(Metabolism);ko00592(Metabolism);ko01100(Metabolism);ko01110(Metabolism);ko01212(Metabolism)
TRINITY_DN14556_c0_g1	21.57	128.38	-2.5713	7.3581e-05	0.0011243	Salicylate carboxymethyltransferase [Actinidia chinensis var. chinensis]	Salicylate carboxymethyltransferase OS=Clarkia breweri OX=36903 GN=SAMT PE=1 SV=1	-	K08241|E2.1.1.141; jasmonate O	ko00592(Metabolism);ko01110(Metabolism)
TRINITY_DN15623_c0_g1	27.85	89.34	-1.692	2.8246e-05	0.00048654	Linoleate 9S-lipoxygenase 6 [Vitis vinifera]	Linoleate 9S-lipoxygenase A OS=Solanum lycopersicum OX=4081 GN=LOX1.1 PE=2 SV=1	Lipoxygenase;Lipoxygenase;PLAT/LH2 domain	K00454|LOX2S; lipoxygenase [EC:1.13.11.12]	ko00591(Metabolism);ko00592(Metabolism);ko01100(Metabolism);ko01110(Metabolism)
TRINITY_DN9086_c0_g1	12.56	409.56	-5.0294	5.1524e-27	1.6623e-24	unnamed protein product [Coffea canephora]	Salicylate carboxymethyltransferase OS=Clarkia breweri OX=36903 GN=SAMT PE=1 SV=1	-	K08241|E2.1.1.141; jasmonate O	ko00592(Metabolism);ko01110(Metabolism)
TRINITY_DN8388_c0_g1	121.85	327.5	-1.4246	3.7856e-08	1.2413e-06	Alcohol dehydrogenase, class III [Handroanthus impetiginosus]	Alcohol dehydrogenase 3 OS=Solanum tuberosum OX=4113 GN=ADH3 PE=2 SV=1	Alcohol dehydrogenase GroES-like domain;Zinc-binding dehydrogenase	K18857|ADH1; alcohol dehydrogenase class	ko00010(Metabolism);ko00071(Metabolism);ko00350(Metabolism);ko00592(Metabolism);ko00620(Metabolism);ko01100(Metabolism);ko01110(Metabolism);ko01120(Metabolism)
TRINITY_DN9086_c0_g2	93.2	275.42	-1.5603	0.0031137	0.027409	salicylate carboxymethyltransferase-like [Coffea arabica]	Anthranilate O-methyltransferase 2 OS=Zea mays OX=4577 GN=AAMT2 PE=1 SV=1	-	K08241|E2.1.1.141; jasmonate O	ko00592(Metabolism);ko01110(Metabolism)
